# Supplementary material for: Cervical intraepithelial neoplasia disease progression is associated with increased vaginal microbiome diversity
Source: PubMed Central journal article supplement (PMC4648063; doi:10.1038/srep16865), 2015-11-17
Supplement: srep16865-s1.pdf [file srep16865-s1.pdf]

**Cervical intraepithelial neoplasia disease progression is associated with increased vaginal microbiome diversity.**

Mitra A, MacIntyre DA, Lee YS, Smith A, Marchesi JR, Lehne B, Bhatia R, Lyons D, Paraskevaidis E, Li JV, Holmes E, Nicholson JK, Bennett PR, Kyrgiou M

**Supplementary Tables**

**Supplementary Table 1.** Rates of each class-based structure according to disease severity and HPV status/genotype – class level

|                                                               | <b>Normal<br/>(&gt;97% Bacilli)<br/>n/N (%)</b> | <b>Transient<br/>(85-97% Bacilli)<br/>n/N (%)</b> | <b>Atypical<br/>(&lt;85% Bacilli)<br/>n/N (%)</b> | <b>TOTAL<br/>n/N (%)</b> |
|---------------------------------------------------------------|-------------------------------------------------|---------------------------------------------------|---------------------------------------------------|--------------------------|
| <b>DISEASE SEVERITY (A)</b>                                   |                                                 |                                                   |                                                   |                          |
| <b>Normal</b>                                                 | 16/20 (80)                                      | 2/20 (10)                                         | 2/20 (10)                                         | 20/20 (100)              |
| <b>LSIL</b>                                                   | 40/52 (77)                                      | 4/52 (8)                                          | 8/52 (15)                                         | 52/52 (100)              |
| <b>HSIL</b>                                                   | 67/92 (73)                                      | 4/92 (4)                                          | 21/92 (23)                                        | 92/92 (100)              |
| <b>Cancer</b>                                                 | 3/5 (60)                                        | 0/5 (0)                                           | 2/5 (40)                                          | 5/5 (100)                |
| <b>Total</b>                                                  | 126/169 (75)                                    | 10/169 (6)                                        | 33/169 (19)                                       | 169/169 (100)            |
| <b>P value<sup>1</sup></b>                                    | 0.33                                            | 0.21                                              | 0.07                                              | -                        |
| <b>Q value<sup>1</sup></b>                                    | 0.33                                            | 0.33                                              | 0.20                                              | -                        |
| <b>DISEASE SEVERITY (B) (ASCUS/LSIL separate)<sup>2</sup></b> |                                                 |                                                   |                                                   |                          |
| <b>Normal</b>                                                 | 16/20 (80)                                      | 2/20 (10)                                         | 2/20 (10)                                         | 20/20 (100)              |
| <b>ASCUS</b>                                                  | 20/26 (77)                                      | 2/26 (8)                                          | 4/26 (15)                                         | 26/26 (100)              |
| <b>LSIL</b>                                                   | 20/26 (77)                                      | 2/26 (8)                                          | 4/26 (15)                                         | 26/26 (100)              |
| <b>HSIL</b>                                                   | 67/92 (73)                                      | 4/92 (4)                                          | 21/92 (23)                                        | 92/92 (100)              |
| <b>Cancer</b>                                                 | 3/5 (60)                                        | 0/5 (0)                                           | 2/5 (40)                                          | 5/5 (100)                |
| <b>Total</b>                                                  | 126/169 (75)                                    | 10/169 (6)                                        | 33/169 (19)                                       | 169/169 (100)            |
| <b>P value<sup>1</sup></b>                                    | 0.36                                            | 0.23                                              | 0.08                                              | -                        |
| <b>Q value<sup>1</sup></b>                                    | 0.36                                            | 0.36                                              | 0.25                                              | -                        |
| <b>HPV STATUS</b>                                             |                                                 |                                                   |                                                   |                          |
| <b>Negative</b>                                               | 17/24 (71)                                      | 3/24 (13)                                         | 4/24 (17)                                         | 24/24 (100)              |

|                                        |             |           |             |               |
|----------------------------------------|-------------|-----------|-------------|---------------|
| <b>Positive</b>                        | 70/94 (74)  | 3/94 (3)  | 21/94 (22)  | 93/93 (100)   |
| <b>Total</b>                           | 87/118 (74) | 6/118 (5) | 25/118 (21) | 117/117 (100) |
| <b>P value<sup>3</sup></b>             | 0.80        | 0.10      | 0.78        | -             |
| <b>Q value<sup>3</sup></b>             | 1.00        | 1.00      | 1.00        | -             |
| <b>HPV GENOTYPE</b>                    |             |           |             |               |
| <b>HPV-16</b>                          | 22/31 (71)  | 2/31 (6)  | 7/31 (23)   | 31/31 (100)   |
| <b>HPV-18</b>                          | 4/5 (80)    | 0/5 (0)   | 1/5 (20)    | 5/5 (100)     |
| <b>Other HR-HPV subtype</b>            | 21/26 (81)  | 1/26 (4)  | 4/26 (15)   | 26/26 (100)   |
| <b>Total</b>                           | 47/62 (76)  | 3/62 (5)  | 12/62 (19)  | 62/62 (100)   |
| <b>P value<sup>3</sup></b>             | 0.81        | 1.00      | 0.89        | -             |
| <b>Q value<sup>3</sup></b>             | 1.00        | 1.00      | 1.00        | -             |
| <b>DISEASE SEVERITY and HPV STATUS</b> |             |           |             |               |
| <b>Normal/LSIL, HPV neg</b>            | 16/20 (80)  | 2/20 (10) | 2/20 (10)   | 20/20 (100)   |
| <b>Normal/LSIL, HPV pos</b>            | 27/34 (79)  | 1/34 (3)  | 6/34 (18)   | 34/34 (100)   |
| <b>HSIL, HPV pos</b>                   | 42/58 (72)  | 1/58 (2)  | 15/58 (26)  | 58/58 (100)   |
| <b>Cancer</b>                          | 3/5 (60)    | 0/5 (0)   | 2/5 (40)    | 5/5 (100)     |
| <b>Total</b>                           | 88/117 (75) | 4/117 (3) | 25/117 (22) | 117/117 (100) |
| <b>P value<sup>1</sup></b>             | 0.29        | 0.10      | 0.06        | -             |
| <b>Q value<sup>1</sup></b>             | 0.29        | 0.20      | 0.19        | -             |

ASCUS: atypical squamous cells of undetermined significance; HPV: Human Papilloma Virus; HPV neg: HPV negative; HPV pos: HPV positive; HR-HPV: High-risk Human Papilloma Virus; HSIL: High-grade Squamous intraepithelial lesion; LSIL: Low-grade squamous intraepithelial lesion

<sup>1</sup>P-value & Q-value calculated using linear regression. <sup>2</sup>ASCUS and LSIL are split in two separate groups <sup>3</sup>P-value calculated using Fishers exact test, Q-value calculated using Benjamini-Hochberg false discovery rate (FDR) method.

**Supplementary Table 2.** Regression analysis of each class-based structure according to disease severity

| Subgroups                                                     | Effect | Standard error | t-value | p-value | q-value |
|---------------------------------------------------------------|--------|----------------|---------|---------|---------|
| <b>DISEASE SEVERITY (A)</b>                                   |        |                |         |         |         |
| Normal                                                        | -0.04  | 0.05           | -0.99   | 0.33    | 0.33    |
| Intermediate                                                  | -0.03  | 0.02           | -1.26   | 0.21    | 0.33    |
| Atypical                                                      | 0.08   | 0.04           | 1.84    | 0.07    | 0.20    |
| <b>DISEASE SEVERITY (B) (ASCUS/LSIL separate)<sup>1</sup></b> |        |                |         |         |         |
| Normal                                                        | -0.03  | 0.03           | -0.92   | 0.36    | 0.36    |
| Intermediate                                                  | -0.02  | 0.02           | -1.21   | 0.23    | 0.36    |
| Atypical                                                      | 0.05   | 0.03           | 1.74    | 0.08    | 0.25    |
| <b>DISEASE SEVERITY and HPV STATUS</b>                        |        |                |         |         |         |
| Normal                                                        | -0.05  | 0.05           | -1.07   | 0.29    | 0.29    |
| Intermediate                                                  | -0.03  | 0.02           | -1.65   | 0.10    | 0.20    |
| Atypical                                                      | 0.09   | 0.05           | 1.87    | 0.06    | 0.19    |

<sup>1</sup>ASCUS and LSIL are split in two separate groups

**Supplementary Table 3.** Regression analysis of each species-based structure according to disease severity

| Subgroups                                                     | Effect | Standard error | t-value | p-value | q-value |
|---------------------------------------------------------------|--------|----------------|---------|---------|---------|
| <b>DISEASE SEVERITY (A)</b>                                   |        |                |         |         |         |
| CST I                                                         | -0.05  | 0.05           | -1.05   | 0.30    | 0.47    |
| CST II                                                        | 0.03   | 0.02           | 1.58    | 0.12    | 0.46    |
| CST III                                                       | -0.04  | 0.05           | -0.88   | 0.38    | 0.47    |
| CST IV                                                        | 0.08   | 0.04           | 1.87    | 0.06    | 0.32    |
| CST V                                                         | -0.02  | 0.02           | -0.73   | 0.47    | 0.47    |
| <b>DISEASE SEVERITY (B) (ASCUS/LSIL separate)<sup>1</sup></b> |        |                |         |         |         |
| CST I                                                         | -0.06  | 0.03           | -1.67   | 0.10    | 0.33    |
| CST II                                                        | 0.02   | 0.01           | 1.60    | 0.11    | 0.33    |
| CST III                                                       | -0.01  | 0.03           | -0.46   | 0.65    | 0.87    |
| CST IV                                                        | 0.05   | 0.03           | 1.87    | 0.06    | 0.32    |
| CST V                                                         | 0.00   | 0.01           | -0.17   | 0.87    | 0.87    |
| <b>DISEASE SEVERITY and HPV STATUS</b>                        |        |                |         |         |         |
| CST I                                                         | -0.10  | 0.06           | -1.74   | 0.08    | 0.34    |
| CST II                                                        | 0.03   | 0.02           | 2.01    | 0.05    | 0.24    |
| CST III                                                       | -0.02  | 0.05           | -0.40   | 0.69    | 0.69    |
| CST IV                                                        | 0.07   | 0.05           | 1.43    | 0.15    | 0.46    |
| CST V                                                         | 0.01   | 0.02           | 0.57    | 0.57    | 0.69    |

CST: Community state type. <sup>1</sup>ASCUS and LSIL are split in two separate groups

**Supplementary Table 4.** Richness and Diversity indices for the study population.

|      | <b>Class<br/>Microbiome<br/>Status</b> | <b>CST Status</b> | <b>Disease<br/>severity<br/>(A)</b> | <b>Number of<br/>sequences</b> | <b>Species<br/>observed</b> | <b>Inverse<br/>Simpson</b> | <b>InvSimpson<br/>_lci</b> | <b>InvSimpson<br/>_hci</b> | <b>Non-<br/>parametric<br/>Shannon</b> | <b>Coverage</b> |
|------|----------------------------------------|-------------------|-------------------------------------|--------------------------------|-----------------------------|----------------------------|----------------------------|----------------------------|----------------------------------------|-----------------|
| A003 | A                                      | 4                 | HSIL                                | 183                            | 12                          | 3.517744                   | 3.097309                   | 4.070248                   | 1.609652                               | 0.983607        |
| A005 | N                                      | 1                 | HSIL                                | 183                            | 2                           | 1.068116                   | 1.016053                   | 1.125803                   | 0.144552                               | 1               |
| A006 | A                                      | 4                 | HSIL                                | 183                            | 11                          | 4.882146                   | 4.087711                   | 6.059862                   | 1.900957                               | 0.989071        |
| A007 | N                                      | 5                 | LSIL                                | 183                            | 1                           | 1                          | 1                          | 1                          | 0                                      | 1               |
| A008 | N                                      | 1                 | HSIL                                | 183                            | 2                           | 1.01105                    | 0.990009                   | 1.033004                   | 0.055747                               | 0.994536        |
| A009 | A                                      | 4                 | HSIL                                | 183                            | 12                          | 5.764278                   | 4.976013                   | 6.849297                   | 1.993397                               | 0.989071        |
| A010 | N                                      | 3                 | HSIL                                | 183                            | 4                           | 1.080662                   | 1.023147                   | 1.145029                   | 0.235495                               | 0.989071        |
| A011 | N                                      | 1                 | HSIL                                | 183                            | 1                           | 1                          | 1                          | 1                          | 0                                      | 1               |
| A013 | N                                      | 1                 | LSIL                                | 183                            | 3                           | 1.155896                   | 1.074211                   | 1.251027                   | 0.301669                               | 1               |
| A014 | A                                      | 4                 | LSIL                                | 183                            | 22                          | 5.21874                    | 4.167965                   | 6.977929                   | 2.322218                               | 0.961749        |
| A015 | N                                      | 3                 | HSIL                                | 183                            | 1                           | 1                          | 1                          | 1                          | 0                                      | 1               |
| A017 | N                                      | 1                 | LSIL                                | 183                            | 1                           | 1                          | 1                          | 1                          | 0                                      | 1               |
| A019 | N                                      | 3                 | LSIL                                | 183                            | 1                           | 1                          | 1                          | 1                          | 0                                      | 1               |
| A020 | A                                      | 4                 | LSIL                                | 183                            | 14                          | 1.585245                   | 1.387612                   | 1.848525                   | 1.102464                               | 0.972678        |
| A021 | I                                      | 3                 | NORMAL                              | 183                            | 4                           | 1.602483                   | 1.419498                   | 1.839625                   | 0.727045                               | 0.994536        |
| A022 | N                                      | 1                 | NORMAL                              | 183                            | 4                           | 1.548252                   | 1.374855                   | 1.7717                     | 0.694882                               | 1               |
| A024 | N                                      | 3                 | NORMAL                              | 183                            | 3                           | 1.104384                   | 1.039173                   | 1.178326                   | 0.234141                               | 0.994536        |
| A026 | N                                      | 3                 | LSIL                                | 183                            | 2                           | 1.01105                    | 0.990009                   | 1.033004                   | 0.055747                               | 0.994536        |
| A027 | N                                      | 4                 | LSIL                                | 183                            | 3                           | 2.074106                   | 1.997367                   | 2.156977                   | 0.767902                               | 1               |
| A028 | N                                      | 1                 | HSIL                                | 183                            | 1                           | 1                          | 1                          | 1                          | 0                                      | 1               |
| A029 | N                                      | 1                 | HSIL                                | 183                            | 1                           | 1                          | 1                          | 1                          | 0                                      | 1               |

|      |   |   |      |     |    |          |          |          |          |          |
|------|---|---|------|-----|----|----------|----------|----------|----------|----------|
| A030 | A | 4 | HSIL | 183 | 11 | 5.629817 | 5.030579 | 6.391123 | 1.912851 | 0.989071 |
| A031 | N | 3 | HSIL | 183 | 3  | 1.092287 | 1.031066 | 1.161236 | 0.217097 | 0.994536 |
| A032 | N | 1 | HSIL | 183 | 1  | 1        | 1        | 1        | 0        | 1        |
| A033 | N | 3 | HSIL | 183 | 3  | 1.080732 | 1.023122 | 1.145217 | 0.193399 | 1        |
| A034 | I | 3 | HSIL | 183 | 7  | 1.398589 | 1.253024 | 1.582421 | 0.704096 | 0.983607 |
| A035 | N | 1 | HSIL | 183 | 1  | 1        | 1        | 1        | 0        | 1        |
| A036 | N | 3 | HSIL | 183 | 1  | 1        | 1        | 1        | 0        | 1        |
| A037 | N | 1 | HSIL | 183 | 1  | 1        | 1        | 1        | 0        | 1        |
| A038 | I | 3 | HSIL | 183 | 9  | 1.640043 | 1.441274 | 1.902409 | 0.937286 | 0.983607 |
| A040 | N | 1 | HSIL | 183 | 2  | 1.01105  | 0.990009 | 1.033004 | 0.055747 | 0.994536 |
| A041 | N | 1 | HSIL | 183 | 4  | 2.073332 | 1.888526 | 2.29823  | 0.863966 | 0.994536 |
| A042 | N | 1 | HSIL | 183 | 3  | 1.341361 | 1.221425 | 1.487416 | 0.461393 | 0.994536 |
| A043 | N | 3 | LSIL | 183 | 3  | 1.313432 | 1.198452 | 1.452815 | 0.44142  | 0.994536 |
| A044 | N | 1 | HSIL | 183 | 2  | 1.022221 | 0.992476 | 1.053804 | 0.067856 | 1        |
| A045 | N | 1 | HSIL | 183 | 1  | 1        | 1        | 1        | 0        | 1        |
| A046 | A | 4 | HSIL | 183 | 13 | 5.046364 | 4.268994 | 6.169878 | 1.974823 | 0.989071 |
| A050 | A | 4 | LSIL | 183 | 10 | 3.794258 | 3.265046 | 4.528209 | 1.626232 | 0.978142 |
| M001 | N | 1 | HSIL | 183 | 2  | 1.044927 | 1.002691 | 1.090878 | 0.106675 | 1        |
| M002 | N | 3 | HSIL | 183 | 5  | 1.080942 | 1.023038 | 1.145796 | 0.271052 | 0.983607 |
| M003 | N | 1 | HSIL | 183 | 2  | 1.352473 | 1.23242  | 1.49844  | 0.427887 | 1        |
| M004 | A | 4 | HSIL | 183 | 10 | 3.640796 | 3.299043 | 4.061536 | 1.533157 | 0.978142 |
| M005 | N | 3 | LSIL | 183 | 3  | 1.281592 | 1.166926 | 1.421248 | 0.448706 | 1        |
| M006 | N | 1 | HSIL | 183 | 2  | 1.01105  | 0.990009 | 1.033004 | 0.055747 | 0.994536 |
| M009 | N | 1 | LSIL | 183 | 3  | 1.068459 | 1.015878 | 1.126779 | 0.180856 | 0.994536 |
| M010 | N | 3 | HSIL | 183 | 2  | 1.068116 | 1.016053 | 1.125803 | 0.144552 | 1        |
| M011 | A | 4 | LSIL | 183 | 9  | 4.074627 | 3.462428 | 4.949813 | 1.679591 | 0.989071 |
| M012 | A | 4 | HSIL | 183 | 13 | 7.265707 | 6.327307 | 8.530924 | 2.176772 | 0.989071 |
| M013 | N | 3 | HSIL | 183 | 2  | 1.664801 | 1.517589 | 1.84364  | 0.586439 | 1        |
| M014 | N | 3 | LSIL | 183 | 2  | 1.033513 | 0.997027 | 1.072772 | 0.08709  | 1        |
| M015 | N | 2 | LSIL | 183 | 3  | 1.340066 | 1.212968 | 1.496917 | 0.496449 | 1        |

|      |   |   |        |     |    |          |          |          |          |          |
|------|---|---|--------|-----|----|----------|----------|----------|----------|----------|
| M016 | N | 1 | HSIL   | 183 | 1  | 1        | 1        | 1        | 0        | 1        |
| M017 | N | 3 | LSIL   | 183 | 2  | 1.380502 | 1.256105 | 1.532247 | 0.446137 | 1        |
| M018 | A | 4 | LSIL   | 183 | 6  | 3.66     | 3.195216 | 4.283019 | 1.465748 | 0.994536 |
| M019 | N | 3 | LSIL   | 183 | 2  | 1.165605 | 1.083625 | 1.261004 | 0.270144 | 1        |
| M020 | N | 3 | HSIL   | 183 | 2  | 1.270155 | 1.164793 | 1.396473 | 0.36736  | 1        |
| M021 | N | 1 | HSIL   | 183 | 2  | 1.01105  | 0.990009 | 1.033004 | 0.055747 | 0.994536 |
| M023 | A | 4 | HSIL   | 183 | 9  | 3.574372 | 2.985317 | 4.453033 | 1.626865 | 1        |
| M024 | N | 1 | HSIL   | 183 | 1  | 1        | 1        | 1        | 0        | 1        |
| M025 | A | 4 | HSIL   | 183 | 10 | 4.178921 | 3.556557 | 5.065301 | 1.724467 | 0.994536 |
| M027 | N | 1 | LSIL   | 183 | 6  | 1.336839 | 1.212055 | 1.490265 | 0.580437 | 0.983607 |
| M028 | N | 3 | HSIL   | 183 | 3  | 1.105116 | 1.039007 | 1.18021  | 0.23109  | 1        |
| M029 | N | 1 | HSIL   | 183 | 2  | 1.056461 | 1.009096 | 1.108493 | 0.12593  | 1        |
| M030 | N | 1 | HSIL   | 183 | 1  | 1        | 1        | 1        | 0        | 1        |
| M031 | N | 3 | HSIL   | 183 | 3  | 1.179474 | 1.093162 | 1.280585 | 0.323981 | 0.994536 |
| M032 | N | 1 | HSIL   | 183 | 5  | 1.131318 | 1.05596  | 1.218258 | 0.334028 | 0.994536 |
| M033 | N | 1 | HSIL   | 183 | 8  | 2.852518 | 2.501651 | 3.317863 | 1.314771 | 0.978142 |
| M034 | A | 4 | HSIL   | 183 | 9  | 2.848127 | 2.368636 | 3.571022 | 1.517152 | 1        |
| M035 | N | 1 | LSIL   | 183 | 4  | 2.059486 | 1.881004 | 2.275389 | 0.853145 | 0.994536 |
| M036 | N | 3 | HSIL   | 183 | 1  | 1        | 1        | 1        | 0        | 1        |
| M038 | A | 4 | HSIL   | 183 | 2  | 1.989368 | 1.932152 | 2.050076 | 0.687748 | 1        |
| M039 | A | 4 | HSIL   | 183 | 7  | 2.219808 | 1.939111 | 2.595525 | 1.115111 | 0.989071 |
| M040 | N | 3 | HSIL   | 183 | 3  | 1.068665 | 1.015776 | 1.127363 | 0.174287 | 1        |
| M041 | N | 1 | HSIL   | 183 | 2  | 1.01105  | 0.990009 | 1.033004 | 0.055747 | 0.994536 |
| M042 | A | 4 | NORMAL | 183 | 11 | 1.339312 | 1.204444 | 1.508191 | 0.787372 | 0.972678 |
| M043 | A | 4 | HSIL   | 183 | 1  | 1        | 1        | 1        | 0        | 1        |
| M045 | N | 4 | HSIL   | 183 | 7  | 1.647344 | 1.460551 | 1.888922 | 0.835043 | 0.983607 |
| M046 | N | 1 | LSIL   | 183 | 5  | 2.891648 | 2.685593 | 3.13195  | 1.154027 | 0.994536 |
| M047 | N | 3 | NORMAL | 183 | 3  | 1.117801 | 1.047375 | 1.198381 | 0.251092 | 1        |
| M048 | A | 4 | HSIL   | 183 | 3  | 1.068459 | 1.015878 | 1.126779 | 0.180856 | 0.994536 |
| M049 | N | 3 | HSIL   | 183 | 12 | 5.050955 | 4.344906 | 6.030995 | 1.906986 | 0.989071 |

|      |   |   |        |     |    |          |          |          |          |          |
|------|---|---|--------|-----|----|----------|----------|----------|----------|----------|
| M050 | N | 5 | LSIL   | 183 | 4  | 1.033706 | 0.996808 | 1.07344  | 0.166376 | 0.983607 |
| M051 | N | 1 | LSIL   | 183 | 2  | 1.033513 | 0.997027 | 1.072772 | 0.08709  | 1        |
| M052 | N | 1 | LSIL   | 183 | 2  | 1.338558 | 1.220785 | 1.481482 | 0.41842  | 1        |
| M054 | I | 4 | HSIL   | 183 | 13 | 2.991915 | 2.657803 | 3.422109 | 1.510216 | 0.978142 |
| M055 | N | 5 | CANCER | 183 | 12 | 2.617985 | 2.193909 | 3.245289 | 1.509116 | 0.989071 |
| M057 | N | 1 | HSIL   | 183 | 4  | 1.105557 | 1.038906 | 1.181346 | 0.260908 | 1        |
| M058 | N | 1 | NORMAL | 183 | 3  | 1.033642 | 0.996881 | 1.073217 | 0.123279 | 0.994536 |
| M059 | N | 1 | HSIL   | 183 | 1  | 1        | 1        | 1        | 0        | 1        |
| M060 | N | 3 | HSIL   | 183 | 2  | 1.103798 | 1.039314 | 1.176813 | 0.196109 | 1        |
| M061 | N | 4 | LSIL   | 183 | 3  | 1.033642 | 0.996881 | 1.073217 | 0.123279 | 0.994536 |
| M062 | A | 4 | HSIL   | 183 | 3  | 1.909967 | 1.724849 | 2.139596 | 0.770555 | 1        |
| M063 | N | 1 | HSIL   | 183 | 13 | 5.794363 | 4.939729 | 7.00659  | 2.042392 | 0.983607 |
| M064 | A | 4 | HSIL   | 183 | 3  | 1.068459 | 1.015878 | 1.126779 | 0.180856 | 0.994536 |
| M065 | N | 3 | HSIL   | 183 | 13 | 5.720715 | 4.991201 | 6.699983 | 1.998711 | 0.972678 |
| M066 | N | 1 | HSIL   | 183 | 2  | 1.01105  | 0.990009 | 1.033004 | 0.055747 | 0.994536 |
| M067 | N | 3 | HSIL   | 183 | 3  | 1.578334 | 1.42611  | 1.766938 | 0.597045 | 1        |
| M068 | N | 1 | LSIL   | 183 | 3  | 1.258635 | 1.154336 | 1.383654 | 0.398258 | 0.994536 |
| M069 | I | 4 | LSIL   | 183 | 1  | 1        | 1        | 1        | 0        | 1        |
| M070 | N | 1 | HSIL   | 183 | 7  | 1.256451 | 1.145423 | 1.391313 | 0.551692 | 0.994536 |
| M071 | A | 4 | HSIL   | 183 | 2  | 1.033513 | 0.997027 | 1.072772 | 0.08709  | 1        |
| M072 | N | 3 | HSIL   | 183 | 8  | 4.481432 | 3.903394 | 5.260426 | 1.686752 | 0.994536 |
| M073 | A | 4 | HSIL   | 183 | 2  | 1.01105  | 0.990009 | 1.033004 | 0.055747 | 0.994536 |
| M074 | N | 3 | LSIL   | 183 | 17 | 8.048816 | 6.954904 | 9.551069 | 2.351875 | 0.978142 |
| M075 | N | 3 | HSIL   | 183 | 3  | 1.056729 | 1.008921 | 1.109295 | 0.161754 | 0.994536 |
| M076 | N | 1 | NORMAL | 183 | 1  | 1        | 1        | 1        | 0        | 1        |
| M077 | N | 1 | LSIL   | 183 | 1  | 1        | 1        | 1        | 0        | 1        |
| M078 | N | 3 | HSIL   | 183 | 6  | 1.330537 | 1.202388 | 1.489261 | 0.600545 | 0.989071 |
| M079 | N | 1 | HSIL   | 183 | 2  | 1.033513 | 0.997027 | 1.072772 | 0.08709  | 1        |
| M080 | N | 1 | HSIL   | 183 | 1  | 1        | 1        | 1        | 0        | 1        |
| M081 | N | 4 | HSIL   | 183 | 1  | 1        | 1        | 1        | 0        | 1        |



|      |   |   |        |     |    |          |          |          |          |          |
|------|---|---|--------|-----|----|----------|----------|----------|----------|----------|
| M082 | N | 1 | HSIL   | 183 | 3  | 1.947492 | 1.836052 | 2.073333 | 0.719621 | 0.994536 |
| M083 | N | 2 | HSIL   | 183 | 3  | 1.25267  | 1.144884 | 1.382861 | 0.420251 | 1        |
| M084 | A | 4 | HSIL   | 183 | 1  | 1        | 1        | 1        | 0        | 1        |
| M085 | N | 5 | LSIL   | 183 | 5  | 3.711388 | 3.443495 | 4.024481 | 1.370046 | 0.994536 |
| M086 | N | 3 | NORMAL | 183 | 2  | 1.022221 | 0.992476 | 1.053804 | 0.067856 | 1        |
| M087 | A | 4 | LSIL   | 183 | 3  | 1.205429 | 1.11284  | 1.314823 | 0.350183 | 0.994536 |
| M088 | I | 5 | LSIL   | 183 | 4  | 1.461815 | 1.312673 | 1.649192 | 0.609267 | 0.994536 |
| M089 | A | 4 | LSIL   | 183 | 4  | 1.419451 | 1.283331 | 1.587873 | 0.555176 | 0.994536 |
| M090 | N | 1 | LSIL   | 183 | 6  | 1.268897 | 1.156058 | 1.406146 | 0.528551 | 0.994536 |
| M091 | N | 2 | HSIL   | 183 | 2  | 1.022221 | 0.992476 | 1.053804 | 0.067856 | 1        |
| M093 | N | 3 | HSIL   | 183 | 2  | 1.01105  | 0.990009 | 1.033004 | 0.055747 | 0.994536 |
| M094 | N | 1 | HSIL   | 183 | 1  | 1        | 1        | 1        | 0        | 1        |
| M095 | A | 4 | HSIL   | 183 | 2  | 1.022221 | 0.992476 | 1.053804 | 0.067856 | 1        |
| M096 | N | 1 | LSIL   | 183 | 10 | 1.480925 | 1.310713 | 1.701943 | 0.886108 | 0.989071 |
| M097 | N | 1 | HSIL   | 183 | 2  | 1.068116 | 1.016053 | 1.125803 | 0.144552 | 1        |
| M100 | N | 1 | HSIL   | 183 | 1  | 1        | 1        | 1        | 0        | 1        |
| M101 | I | 3 | LSIL   | 183 | 2  | 1.01105  | 0.990009 | 1.033004 | 0.055747 | 0.994536 |
| M102 | N | 3 | LSIL   | 183 | 2  | 1.217058 | 1.122814 | 1.328571 | 0.321466 | 1        |
| M103 | N | 2 | HSIL   | 183 | 1  | 1        | 1        | 1        | 0        | 1        |
| M104 | N | 5 | LSIL   | 183 | 1  | 1        | 1        | 1        | 0        | 1        |
| M132 | N | 1 | CANCER | 183 | 3  | 2.192049 | 1.93465  | 2.528453 | 0.923912 | 1        |
| M133 | N | 3 | LSIL   | 183 | 1  | 1        | 1        | 1        | 0        | 1        |
| M136 | N | 5 | LSIL   | 183 | 2  | 1.297266 | 1.186741 | 1.430492 | 0.388562 | 1        |
| M138 | N | 1 | NORMAL | 183 | 4  | 1.06887  | 1.015673 | 1.127949 | 0.209686 | 0.994536 |
| M140 | N | 1 | NORMAL | 183 | 2  | 1.165605 | 1.083625 | 1.261004 | 0.270144 | 1        |
| M141 | N | 3 | NORMAL | 183 | 3  | 1.033642 | 0.996881 | 1.073217 | 0.123279 | 0.994536 |
| M142 | N | 1 | NORMAL | 183 | 3  | 1.49946  | 1.357499 | 1.67458  | 0.555182 | 0.994536 |
| M143 | N | 3 | NORMAL | 183 | 4  | 1.056931 | 1.008791 | 1.109895 | 0.197294 | 0.989071 |
| M145 | N | 3 | NORMAL | 183 | 1  | 1        | 1        | 1        | 0        | 1        |
| M152 | N | 1 | LSIL   | 183 | 2  | 1.068116 | 1.016053 | 1.125803 | 0.144552 | 1        |

|      |   |   |        |     |    |          |          |          |          |          |
|------|---|---|--------|-----|----|----------|----------|----------|----------|----------|
| M153 | N | 1 | NORMAL | 183 | 2  | 1.01105  | 0.990009 | 1.033004 | 0.055747 | 0.994536 |
| M154 | A | 4 | NORMAL | 183 | 7  | 2.209207 | 1.908653 | 2.622107 | 1.127411 | 1        |
| M156 | N | 1 | LSIL   | 183 | 2  | 1.678561 | 1.531484 | 1.856887 | 0.59171  | 1        |
| M157 | N | 1 | HSIL   | 183 | 6  | 1.703457 | 1.524084 | 1.930686 | 0.787029 | 0.989071 |
| M158 | N | 1 | NORMAL | 183 | 2  | 1.091785 | 1.031222 | 1.159906 | 0.179617 | 1        |
| M159 | N | 1 | LSIL   | 183 | 3  | 2.020505 | 1.876927 | 2.187869 | 0.775368 | 1        |
| M160 | N | 1 | LSIL   | 183 | 1  | 1        | 1        | 1        | 0        | 1        |
| M162 | N | 1 | LSIL   | 183 | 2  | 1.091785 | 1.031222 | 1.159906 | 0.179617 | 1        |
| M163 | N | 1 | LSIL   | 183 | 2  | 1.01105  | 0.990009 | 1.033004 | 0.055747 | 0.994536 |
| M164 | N | 1 | LSIL   | 183 | 4  | 2.138839 | 1.947998 | 2.371133 | 0.893032 | 0.994536 |
| M166 | N | 3 | NORMAL | 183 | 4  | 1.35832  | 1.233834 | 1.510745 | 0.513787 | 0.989071 |
| M168 | N | 3 | LSIL   | 183 | 3  | 1.261878 | 1.154863 | 1.390751 | 0.406843 | 1        |
| M169 | N | 1 | LSIL   | 183 | 2  | 1.01105  | 0.990009 | 1.033004 | 0.055747 | 0.994536 |
| M170 | A | 4 | LSIL   | 183 | 10 | 1.214661 | 1.113675 | 1.335787 | 0.618425 | 0.967213 |
| M174 | A | 4 | CANCER | 183 | 7  | 4.976987 | 4.590058 | 5.435157 | 1.676453 | 0.994536 |
| M175 | N | 3 | HSIL   | 183 | 6  | 1.158228 | 1.074144 | 1.256594 | 0.400836 | 0.994536 |
| M176 | A | 4 | CANCER | 183 | 16 | 6.218447 | 5.25611  | 7.612147 | 2.175393 | 0.983607 |
| M177 | A | 4 | HSIL   | 183 | 16 | 7.056356 | 6.129191 | 8.314021 | 2.230323 | 0.972678 |
| M178 | I | 1 | NORMAL | 183 | 7  | 2.935484 | 2.548075 | 3.461818 | 1.331454 | 0.989071 |
| M180 | N | 1 | LSIL   | 183 | 3  | 1.033642 | 0.996881 | 1.073217 | 0.123279 | 0.994536 |
| M181 | N | 2 | CANCER | 183 | 1  | 1        | 1        | 1        | 0        | 1        |
| M182 | N | 1 | HSIL   | 183 | 2  | 1.566162 | 1.421882 | 1.74303  | 0.545215 | 1        |
| M183 | N | 3 | HSIL   | 183 | 2  | 1.091785 | 1.031222 | 1.159906 | 0.179617 | 1        |
| M185 | N | 1 | NORMAL | 183 | 3  | 1.068459 | 1.015878 | 1.126779 | 0.180856 | 0.994536 |
| M186 | N | 3 | HSIL   | 183 | 2  | 1.044927 | 1.002691 | 1.090878 | 0.106675 | 1        |
| M187 | N | 4 | HSIL   | 183 | 3  | 1.818609 | 1.66626  | 2.00162  | 0.688203 | 1        |
| M188 | N | 1 | LSIL   | 183 | 1  | 1        | 1        | 1        | 0        | 1        |
| M189 | N | 3 | HSIL   | 183 | 1  | 1        | 1        | 1        | 0        | 1        |

A: Abnormal; CST: Community state type; CST I = *Lactobacillus crispatus*-dominant; CST II = *Lactobacillus gasseri*-dominant; CST III = *Lactobacillus iners*-dominant, CST IV = high-diversity, *Lactobacillus spp*-deplete; CST V = *Lactobacillus jensenii*-dominant; HSIL: High-grade squamous intraepithelial lesion; I:

*Intermediate; InvSimpson\_hci: Inverse Simpson higher confidence interval; InvSimpson\_lci: Inverse Simpson lower confidence interval; LSIL: Low-grade squamous intraepithelial lesion; N: Normal*

## Supplementary Figures

Supplementary Figure 1. Bacterial class diversity in study cohort and controls

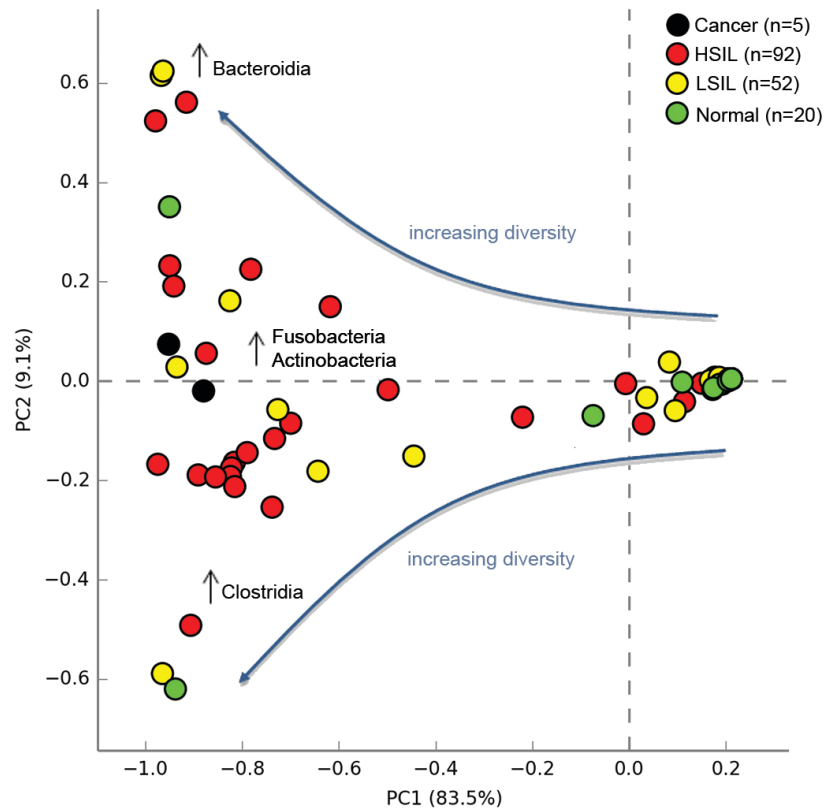

KEY - Cancer: Black; High-grade squamous intra-epithelial lesions (HSIL): Red; Low-grade squamous intra-epithelial lesions (LSIL): Yellow; Normal: Green.

**Supplementary Figure 2. Vaginal microbiome composition according to disease and HPV status** Hierarchical clustering analysis (HCA) using centroid clustering.

**DISEASE SEVERITY I** - Normal: Green; Low-grade squamous intra-epithelial lesions (LSIL): Yellow; High-grade squamous intra-epithelial lesions (HSIL): Red;

Cancer: Black

**DISEASE SEVERITY II** - Normal: white; ASCUS: light grey; LSIL: dark grey; HSIL: blue; Cancer: pink

**HPV STATUS** - HPV negative: light grey; HPV positive: blue; Unknown: white

**HPV GENOTYPE** - HPV negative: light grey; HPV16: pink; HPV18: blue; Other HR-HPV: dark grey; Unknown: white

**DISEASE SEVERITY I & HPV STATUS** - LSIL/Normal HPV negative: light grey; LSIL/Normal HPV positive: dark grey; HSIL/HPV positive: blue; Cancer: pink;

unknown/other: white

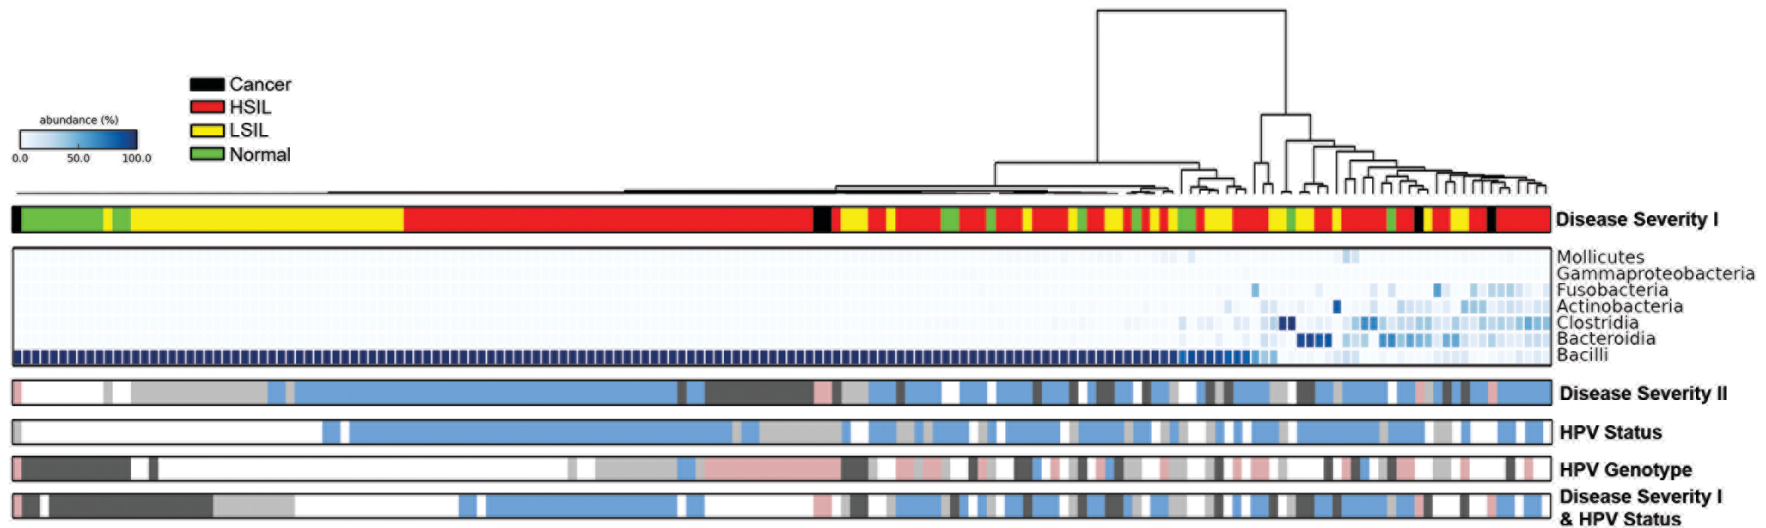

KEY - ASCUS: atypical squamous cells of undetermined significance; CST: community state type; HPV: Human Papillomavirus; HR-HPV: high-risk HPV; HSIL: High-grade squamous intra-epithelial lesion; ICC: invasive cervical cancer; LSIL: Low-grade squamous intra-epithelial lesion

**Supplementary Figure 3.** Mean proportion of *Lactobacillus* spp. (A) content and *Sneathia* spp. (B) content according to disease severity (normal vs LSIL vs HSIL vs ICC)

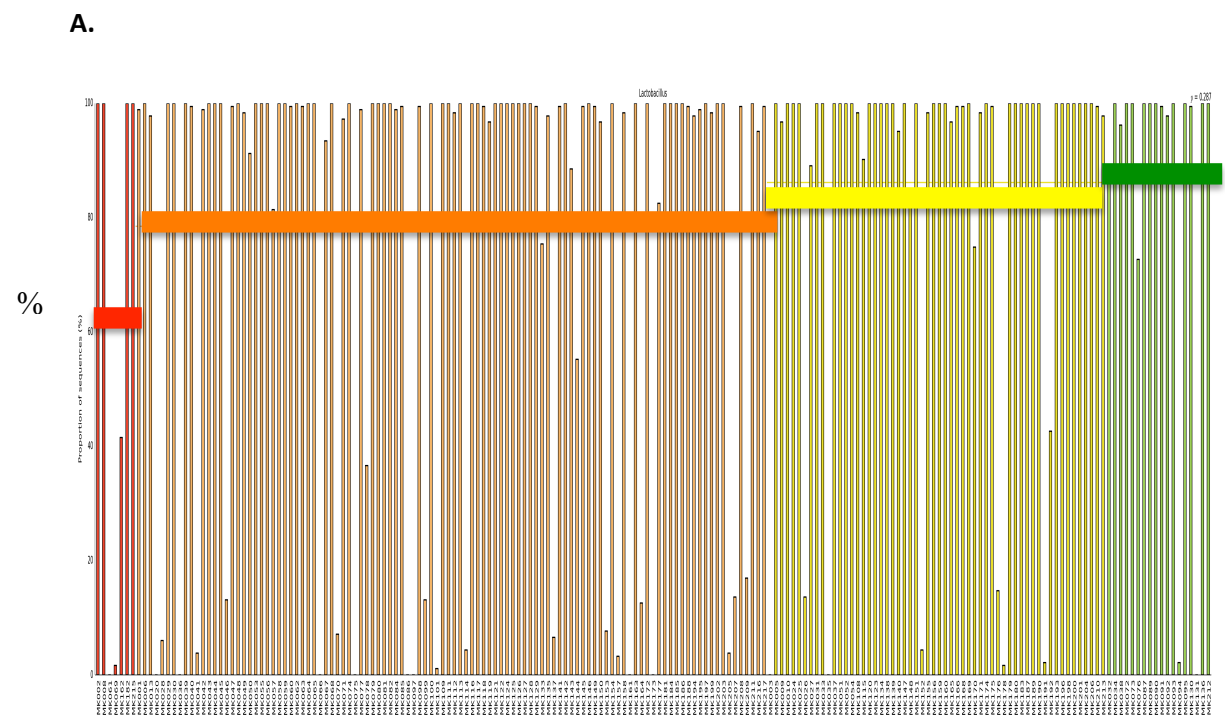

**B.**

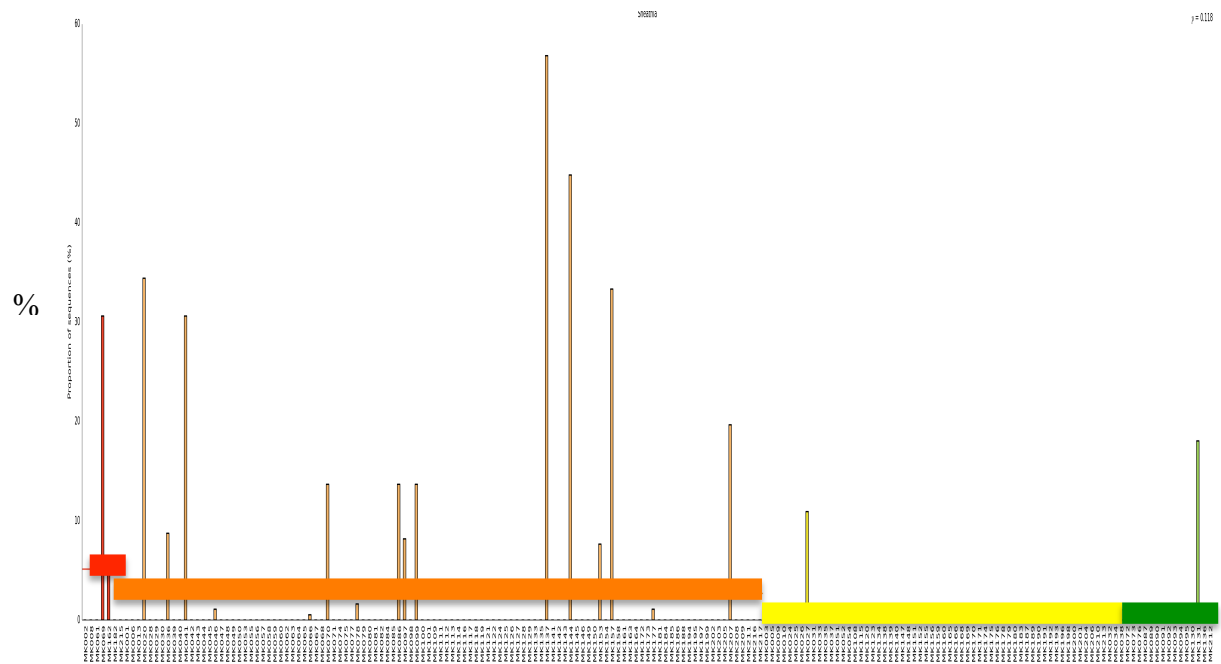

KEY: Normal: Green; Low-grade squamous intra-epithelial lesions (LSIL): Yellow; High-grade squamous intra-epithelial lesions (HSIL): Orange; Invasive Cervical Cancer (ICC): Red
